# Supplementary material for: Dietary Crocin is Protective in Pancreatic Cancer while Reducing Radiation-Induced Hepatic Oxidative Damage
Source: MDPI journal article supplement (doi:10.3390/nu12061901), 2020-06-26
Supplement: s1 [file s1]

## Supplementary Figures:

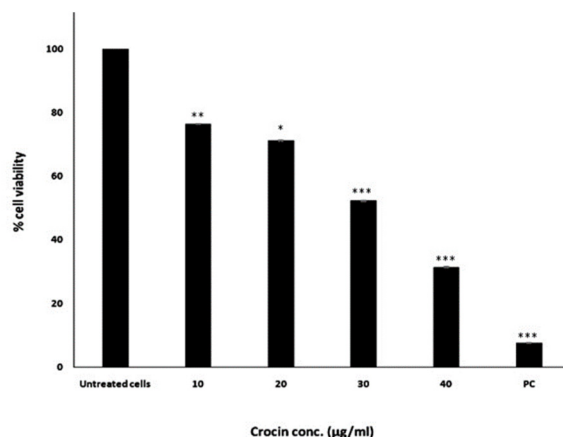

**Figure S1.** Cytotoxicity of crocin on BXPc3 cells. BXPc3 cells were treated with 10, 20, 30 and 40 μg/mL of crocin. After 24 h treatment, the cell viability was measure by MTT assay. Data presented as mean ± SD of triplicates of three independent experiments. PC: Positive control (doxorubicin).

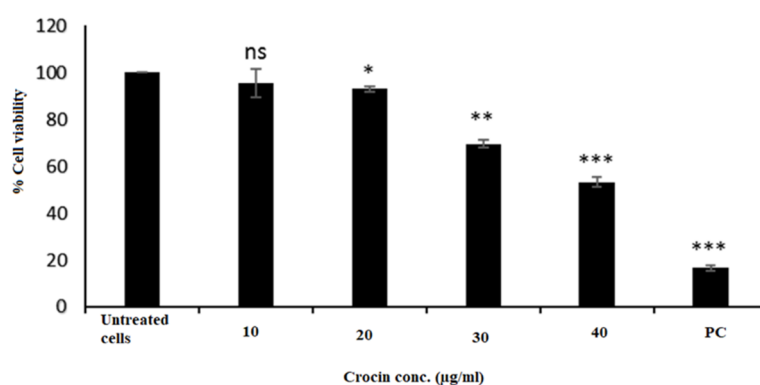

**Figure S2.** Cytotoxicity of crocin on Capan-2 cells. Capan-2 cells were treated with 10, 20, 30 and 40 μg/mL of crocin. After 24 h treatment, the cell viability was measure by MTT assay. Data presented as mean ± SD of triplicates of three independent experiments. PC: Positive control (doxorubicin).

## Tables and Legends

**Table S1.** Crocin enriched checkpoints and pathways of BXPc3 cells.

| Term                               | Number of Genes | P-Value  |
|------------------------------------|-----------------|----------|
| <b>Upregulated checkpoints</b>     |                 |          |
| Cell cycle checkpoint              | 7               | 0.00018  |
| Response to DNA damage stimulus    | 22              | 0.000678 |
| DNA integrity check point          | 5               | 0.000227 |
| DNA damage checkpoint              | 5               | 0.000227 |
| Mitotic Spindle checkpoint         | 2               | 0.0056   |
| Spindle checkpoint                 | 2               | 0.0056   |
| Mitotic checkpoint                 | 3               | 0.0058   |
| Programed cell death               | 35              | 0.0134   |
| DNA modification                   | 5               | 0.0219   |
| Regulation of cell differentiation | 10              | 0.0227   |

|                                           |    |          |
|-------------------------------------------|----|----------|
| Cell death                                | 35 | 0.0316   |
| Death                                     | 35 | 0.0367   |
| Cell adhesion molecule binding            | 3  | 0.00377  |
| <b>Upregulated pathways</b>               |    |          |
| Cell cycle                                | 32 | 1.34E-14 |
| Pyrimidine metabolism                     | 13 | 0.000262 |
| Purine metabolism                         | 16 | 0.000438 |
| DNA polymerase                            | 4  | 0.00144  |
| Glycan structure-biosynthesis-2           | 9  | 0.00382  |
| Neurodegenerative disorders               | 3  | 0.0119   |
| Folate biosynthesis                       | 6  | 0.0122   |
| Amyotrophic lateral sclerosis (ALS)       | 2  | 0.0128   |
| Methionine metabolism                     | 4  | 0.0273   |
| Selenoamino acid metabolism               | 4  | 0.0334   |
| One carbon pool by folate                 | 3  | 0.0345   |
| Glucospinolipid biosynthesis lacto series | 2  | 0.0401   |
| Glycosylate and decarboxylate metabolism  | 2  | 0.0401   |

**Table S2.** Crocin downregulated checkpoints and pathways in BXPC3 cells.

| Term                                                                                    | Number of Genes | P-Value  |
|-----------------------------------------------------------------------------------------|-----------------|----------|
| <b>Downregulated checkpoints</b>                                                        |                 |          |
| Organismal physiological process                                                        | 84              | 5.35E-05 |
| G-protein coupled receptor protein signaling pathway                                    | 65              | 0.000183 |
| Cell surface receptor linked signal transduction                                        | 79              | 0.00203  |
| Signal transduction                                                                     | 102             | 0.0203   |
| Prostaglandin transport                                                                 | 1               | 0.0238   |
| G-protein signaling, adenylate cyclase activity pathways                                | 4               | 0.0252   |
| Positive regulation of signal transduction                                              | 3               | 0.0282   |
| Regulation of epidermal growth factor receptor-signaling pathway                        | 1               | 0.0471   |
| Prostaglandin metabolism G-protein signaling coupled to cAMP nucleotide second receptor | 4               | 0.0517   |
| Regulation of MAPK activity                                                             | 4               | 0.0517   |
| Regulation of cell growth                                                               | 4               | 0.0544   |
| G-protein coupled receptor activity                                                     | 56              | 0.00119  |
| G-protein coupled receptor binding                                                      | 5               | 0.00686  |
| Notch binding                                                                           | 1               | 0.0241   |
| Interleukin-11 receptor binding                                                         | 1               | 0.0241   |
| Prostaglandin transporter activity                                                      | 1               | 0.0476   |
| <b>Downregulated pathways</b>                                                           |                 |          |
| Arachidonic acid metabolism                                                             | 6               | 0.0181   |
| Cytokine-cytokine receptor interaction                                                  | 13              | 0.0147   |
| Complement and coagulation cascades                                                     | 7               | 0.00229  |
| Glutathione metabolism                                                                  | 4               | 0.00471  |
| Metabolism of xenobiotic by cytochrome P450                                             | 5               | 0.011    |
| Glycerolipid metabolism                                                                 | 4               | 0.0262   |
